# Supplementary material
Source: PubMed Central journal article supplement (PMC6295279)
Supplement: NIHMS1507640-supplement-1.pdf [file NIHMS1507640-supplement-1.pdf]

## **Osimertinib resistance landscape Le et al 2018**

### **Supplementary Material and Methods:**

#### Sequencing methods:

Molecular Diagnostic Laboratory test (MDL): MD Anderson MDL is a tissue molecular profiling method, which was completed using CLIA-certified next generation sequencing assays performed by our institution's Molecular Diagnostic Laboratory. For limited tissue sample, molecular testing was with a NGS based analysis for the detection of mutations in hotspot regions of 50 genes. In April 2016, an expanded NGS based analysis of 134 unique genes for the detection of somatic mutations in coding sequences of 128 genes and selected copy number variations (amplifications) in 49 genes.

Biodesix GeneStrat: Genestrat is a laboratory test service that determines the presence of somatic genetic variants in circulating nucleic acids (DNA and RNA) from the plasma of patients with cancer using ddPCR (droplet digital polymerase chain reaction) . In the ddPCR process, a patient sample is dispersed in an emulsion so that individual nucleic acid molecules are isolated. After amplification, nucleic acids are quantified by counting the emulsion that contains PCR end-product, or positive reactions. Detection of variants occurs relative to a background of at least 300 copies of wild type or a control gene. GeneStrat is a genomic approach to detection of insertion, deletions and point mutations, as well as fusion products.

Pyrosequencing: this EGFR mutation testing through pyrosequencing technology tests for targeting mutations on four EGFR exons: 18, 19, 20, and 21. Paraffin embedded tissue is sectioned and deparaffinized. The tumor area in the section is outlined by a board-certified pathologist. The tumor area is microdissected and used for DNA extraction. The sequences to be analyzed are amplified using PCR and then sequenced using pyrosequencing. The sequences to be analyzed

for each exon are as following: DSCTCCGGTGC for exon 18, codon 719, using a dispensing order of CATGTCACCTCGTG; TATCAAGGAATTAAGAGAAGCAACATCTCCGAAAG for exon 19 deletion, using a dispensing order of CTATCACTGTCAGCTCGATCGTCATCGTCACGC; CAKCGTGG and ATCAYGCAG for exon 20, codon 786, 790, and insertion, using a dispensing order of GCAGTACGTGTCGTGTACGTGACCACACTG and GATCATCTG respectively; CKGGCCAAACDGCTGGGT for exon 21, codon 858, using a dispensing order of ACGTGTCACATGTC. The reagents and instrument are from Qiagen. The pyrosequencer is a Pyromark MD 96. The test is validated in the Molecular Diagnostic Laboratory at Moffitt Cancer Center, this assay demonstrated a sensitivity of 5%, meaning if there is 5% or more tumor cells in the specimen, it will be detected. This test covers over 95% of known mutations at EGFR with a specificity of 95% during validation against the results from a reference laboratory. The test performance characteristics were determined by the Molecular Diagnostic Laboratory at Moffitt Cancer Center. This type of test has not been approved by the US Food and Drug Administration. However, such approval is not required for clinical implementation, and test results have been shown to be clinically useful. This laboratory is CAP accredited and CLIA certified to perform high complexity testing.

Moffitt trusite: Moffitt trusite uses targeted next-generation sequencing to analyze coding regions of the most inclusive annotated RefSeq transcript for each of the targeted genes. Target enrichment was performed using amplicon based targeted capture using Trusight Tumor Panel (Illumina). Sequencing of enriched libraries was performed in multiplex on the Illumina MiSeq using the paired-end, 150 base-pair configuration. For single base-pair substitutions, this test has a sensitivity of 98.95% for variant allele frequencies of 3-5% and a sensitivity of 100% for variant allele frequencies >5%. Specificity and positive predictive value are 100% for substitutions with

a variant allele frequency  $>3\%$ . Cutoff criteria were set such that a minimum variant allele frequency of 3% and a depth of 1000x were required to call single nucleotide variants. For insertions and deletions, an evaluation of this gene panel identified 22 of 22 insertions and deletions. Cutoff criteria were set such that a minimum variant allele frequency of 10% and a depth of 2000x were required to call insertions and deletions. Note that it is possible that pathogenic variants may not be reported by one or more of the tools because of the parameters used. However, tool parameters were optimized to maximize specificity and sensitivity.

#### Germline tests and definition of germline EGFR T790M mutation

In our cohort, germline tests were NOT performed directly for any of the genetic profiling platforms. For tissue samples using MD Anderson Molecular Diagnostic Laboratory (MDL) test and Foundation One, no germline control blood was required, therefore, the report only reflects the tumor sample genetic alterations. For liquid biopsies using Guardant360, the germline mutation is not directly tested, but inferred by allelic frequency. As Guardant Health state in their website, <https://portal.guardanthealth.com/myguardant/resources>, the germline mutations' allelic frequency is near 50%, whereas most of the somatic tumor mutations are below 0.5%. In our cohort, the germline T790M cases were inferred from very high allelic frequency (near 50%).

#### Cell lines, western blotting and MTS assay

Cell lines (H1975, HCC827, HCC4006, and Ba/F3) were maintained in 10% fetal bovine serum (FBS; Sigma) RPMI medium. Erlotinib, osimertinib and propranolol were obtained from the institutional pharmacy at the University of Texas MD Anderson Cancer Center. Norepinephrine

(Sigma-Aldrich). The rest of the compounds including topretinib were obtained from Selleck Chemicals.

The procedure for western blotting was previously described [Nillson et al 2017]. The following antibodies were used for Western blotting: pEGFR (Cell Signaling), EGFR (Santa Cruz Biotechnology Inc.), p-ERK (Cell Signaling), E-cadherin (Cell Signaling), Vimentin (Cell Signaling), c-Met (Cell Signaling), Vinculin (1:10,000; Sigma-Aldrich), and b-actin (1:10,000; Sigma-Aldrich).

Cells (2000 cells per well in 96-well plates) were treated with increasing concentrations of inhibitors. After 5 days, MTS (3-(4,5-dimethylthiazol-2-yl)-5-(3-carboxymethoxyphenyl)-2-(4-sulfophenyl)-2H-tetrazolium, inner salt) assays were performed. To evaluate the effect of norepinephrine (NE) on EGFR TKI resistance, we seeded cells in 24-well plates (40,000 cells per well) and treated them with NE for 24 hours, and then, osimertinib was added to the culture medium. After 5 days, cell viability was measured by MTS assay. propranolol (1 mM) were added 1 hour before the addition of NE.

#### T790M, TP53, cell cycle gene status analysis

Each of the 42 cases with genetic profiling at progression on osimertinib was evaluated for T790M, TP53 and cell cycle gene status. T790M was classified as loss vs. preserved. TP53 was classified as mutant vs. wildtype. In cases where TP53 was present in the pre-treatment test but not in the post-treatment test, the status was deemed wildtype. In the cases where TP53 mutations were present both in the pre- and post-treatment tests, the status was deemed mutant. For cell cycle genes, CDK4, CDK6, CCND1 and CCNE1 amplifications, as well as CNKN2A loss were

used for cell cycle gene alteration analysis. Similar to TP53 status analysis, alterations were defined solely based on post-treatment status.

## Supplementary Table and Figure Legends

**Supple. Figure 1.** Consort diagram for the retrospective cohort from MD Anderson Cancer Center and Moffitt Cancer Center

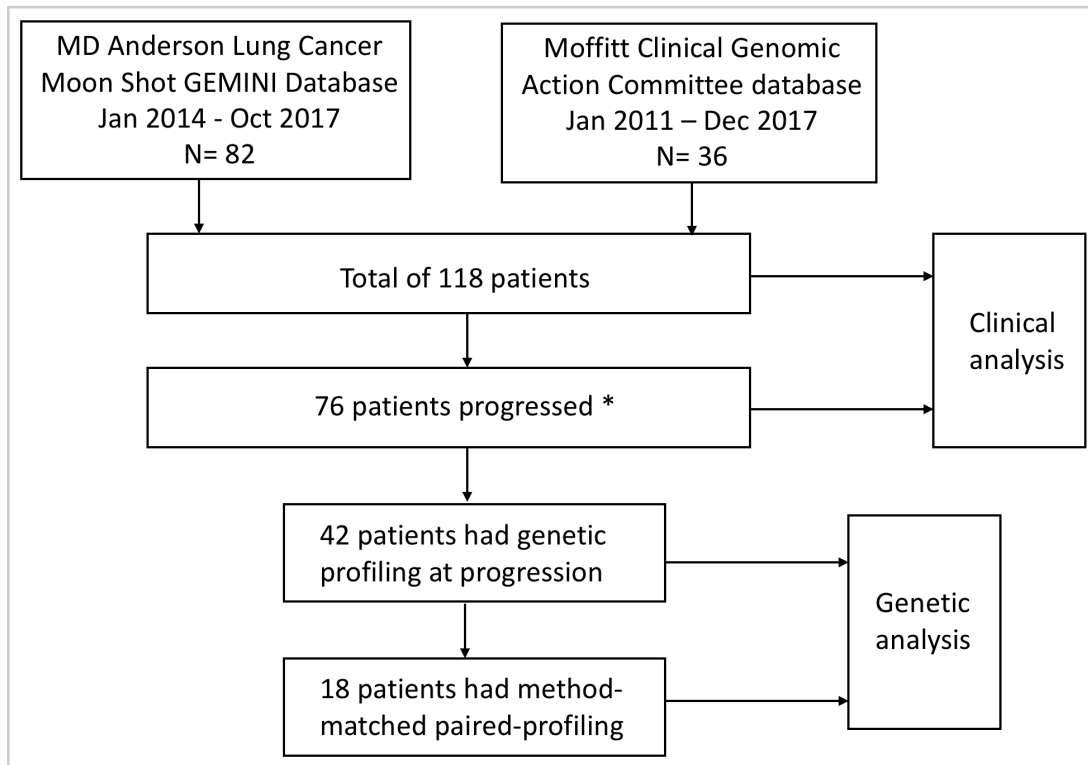

\* cut-off MDA Feb 2018 and Moffitt Jan 2018

**Supple. Figure 2.** Kaplan-Meier estimate of median overall survival since starting of osimertinib (OS 1) was 25.2 months (95% CI, 17.5 to 29.2).

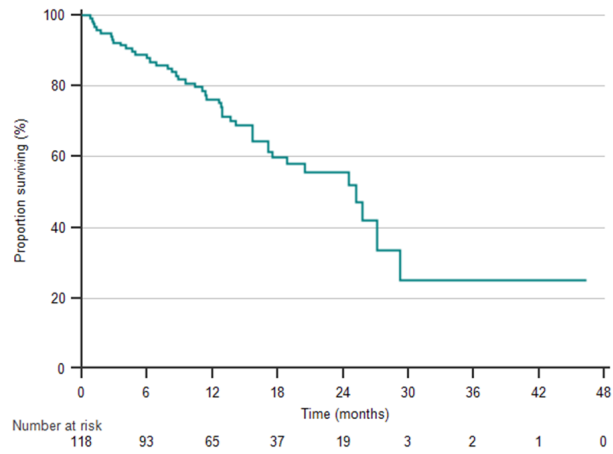

**Supple. Figure 3.** Kaplan-Meier estimate of PFS1 inpatients without and with CNS metastases

10.4 months versus 4.6 months (HR 1.9, 95% CI 1.2-3.0, log-rank  $p=0.01$ ).

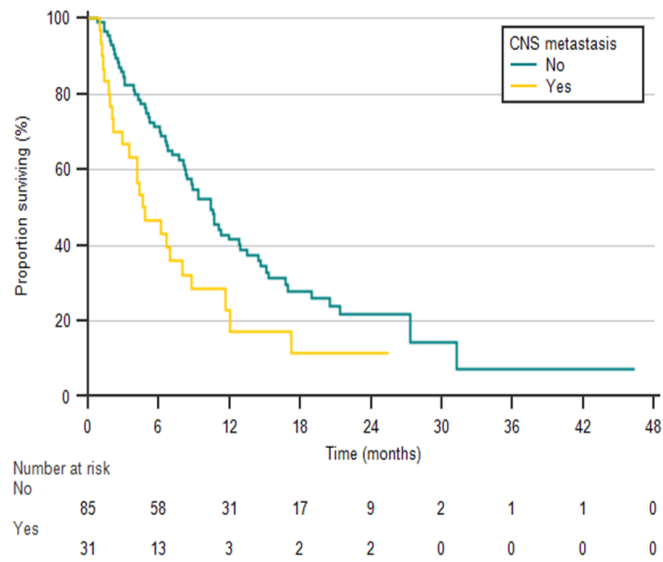



**Supple Figure 4.** Multivariate analysis of PFS1 based on T790M and TP53 alteration status. (A) Kaplan-Meier estimates of survival for T790M-preserved versus T790M-loss patients. Two germline T790M cases were excluded from this analysis. (B) Kaplan-Meier estimates of survival for TP53 mutated (MUT) versus wild-type (WT) patients.

**A**

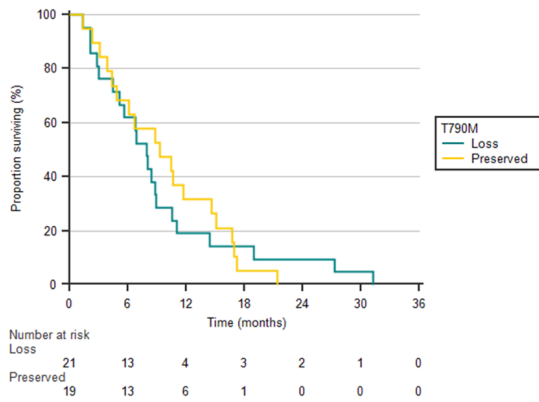

**PFS1 T790M Preserved vs Loss 9.3 months vs 8.0 months (HR 0.9, 95% CI 0.5 – 1.8, log-rank p=0.84)**

**B**

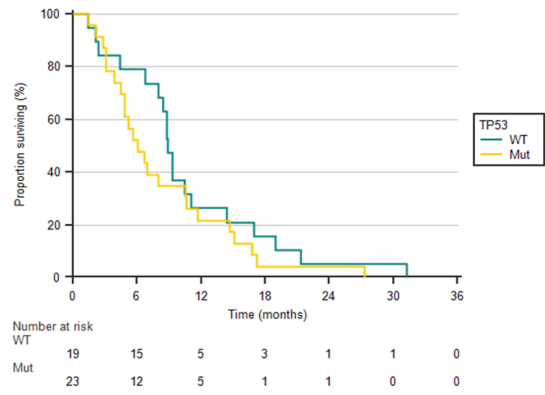

**PFS1 TP53 WT vs Mut 9.3 months vs 8.0 months (HR 1.4, 95% CI 0.8 – 2.6, log-rank p=0.27)**

**Supple. Figure 5.** Kaplan-Meier estimates of PFS2 was estimated at 12.6 months (95% CI 8.3-15.5 months).

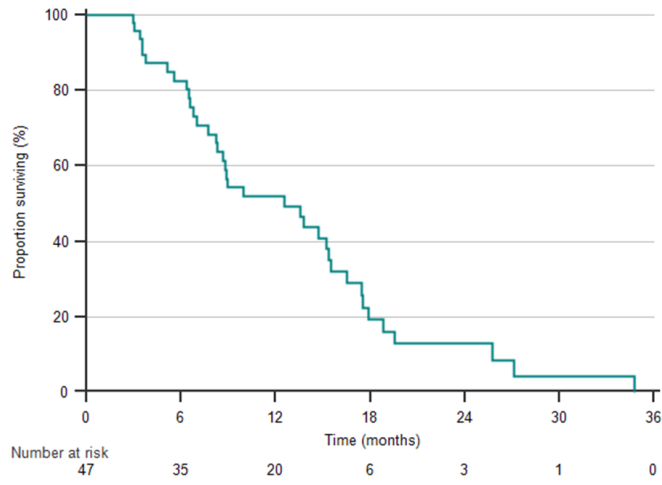

**Supple. Figure 6.** Kaplan-Meier estimates of PFS2 for patients who received radiation vs. not received radiation while continued on osimertinib after first progression. Radiation group vs. no radiation 15.5 vs 8.2 months; HR 0.5; 95% CI 0.3 to 1.0, log-rank  $p=0.05$

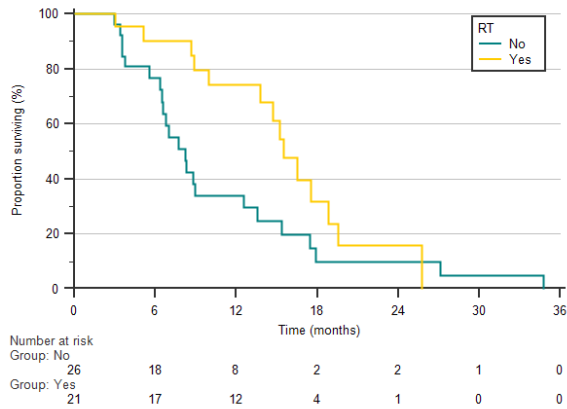

**Supple. Figure 7.** (A) Erlotinib-resistant HCC827 cells (HCC827-ER) were also resistant to osimertinib. IC50 of four different erlotinib-resistant HCC827 cell clones were shown. All greater than 2 $\mu$ M. (B). H1975 OR2 and OR13 cells are resistant to osimertinib compared to H1975 parental cells. (C). Sequencing results for EGFR exon 20 region of HCC827, HCC827 ER1, ER2, ER3 and ER6 clones. (D). HCC827 cells were treated with propranolol (PPL) before norepinephrine (NE) stimulation (\* indicates  $p \leq 0.05$ ). After 24 hours, cells were treated with erlotinib for 5 days. Cell viability was evaluated by MTS assay (adapted from Nilsson et al 2017 Sci Transl Med (25)).

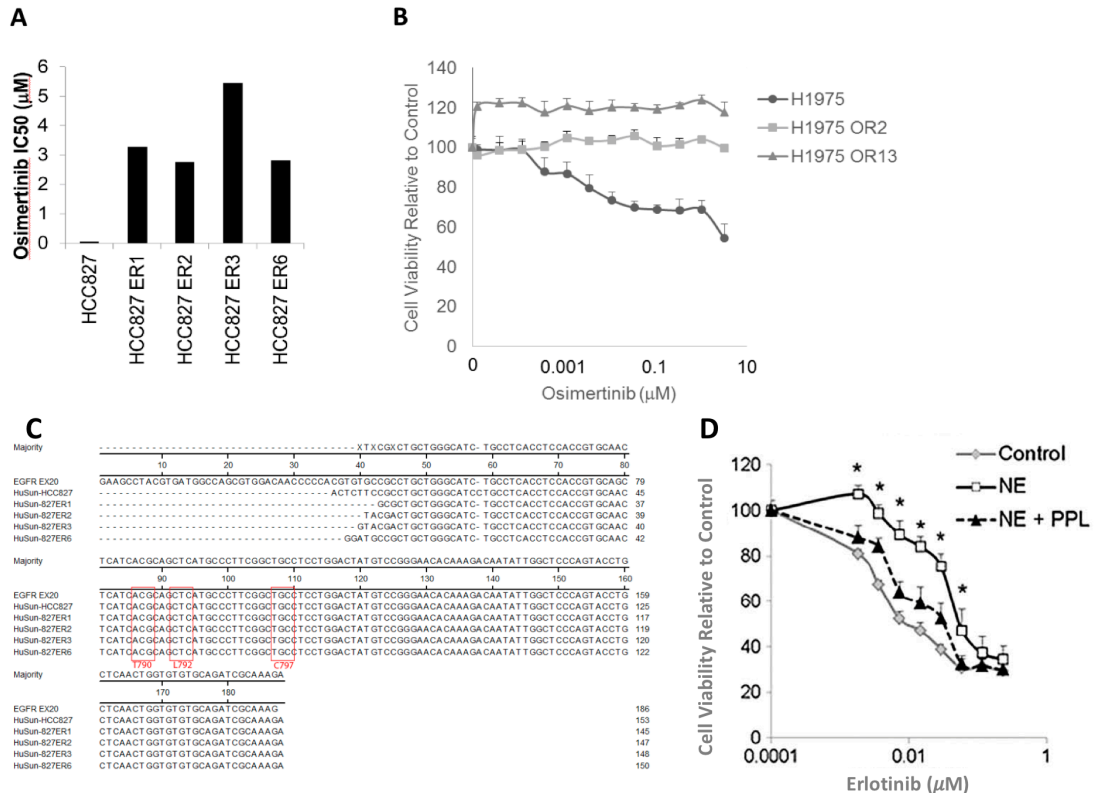

**Supple. Fig. 8.** Acquired resistance mechanisms in platform-matched 18 cases. Each column represents a patient case and each row represents a genetic alteration.

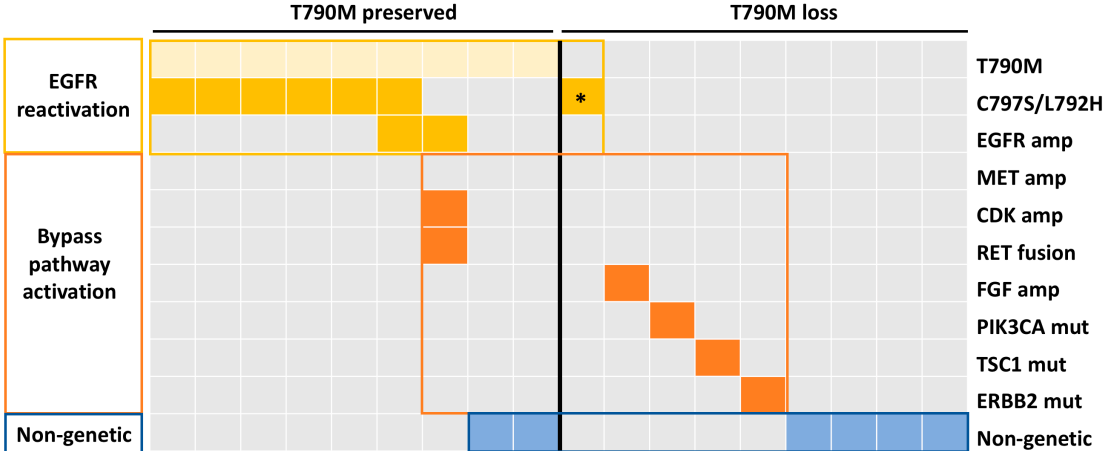

\* EGFR V834L

**Supple. Table 1.** Radiation sites for patients who received local consolidative radiotherapy (LCT) while continuing on osimertinib.

| Genetic ID | MDACC/MCC ID | Site of progression                                      | Organs             | Number of lesions radiated | Comments  |
|------------|--------------|----------------------------------------------------------|--------------------|----------------------------|-----------|
|            | MDA1         | Brain                                                    | Brain              | One                        | GammKnife |
| 3          | MDA14        | Right lower lobe                                         | Lung               | Two                        |           |
| 23         | MDA18        | L3 spine                                                 | Bone               | One                        |           |
| 25         | MDA24        | Left iliac                                               | Bone               | One                        |           |
| 26         | MDA26        | Right hilum                                              | Lymph nodes        | One                        |           |
|            | MDA27        | Left hilum                                               | Lymph nodes        | Two                        |           |
| 11         | MDA28        | Brain                                                    | Brain              | >15                        | WBRT      |
|            | MDA41        | Right lower lobe + right hilum + mediastinal lymph nodes | Lung + Lymph nodes | Three                      |           |
| 37         | MDA42        | Left pelvic bone                                         | Bone               | One                        |           |
| 31         | MDA45        | Right 4th rib + left iliac                               | Bone               | Two                        |           |
| 36         | MDA54        | T1-T4 + T11-L1 spine                                     | Bone               | Two                        |           |
|            | MDA60        | Right upper lobe                                         | Lung               | One                        |           |
| 9          | MDA61        | C6-7 spine + right upper lobe                            | Lung + Bone        | Two                        |           |
| 6          | MDA64        | Right lower lobe + right hilum                           | Lung + Lymph nodes | Two                        |           |
|            | MDA67        | Right upper lobe                                         | Lung               | One                        |           |
|            | MDA71        | L1-L3 spine                                              | Bone               | One                        |           |
| 34         | MDA74        | Right upper lobe                                         | Lung               | One                        |           |
| 41         | MCC27        | Left acetabulum                                          | Bone               | One                        |           |
| 42         | MCC56        | Mediastinal lymph node (aortopulmonary window)           | Lymph nodes        | One                        |           |
| 39         | MCC15        | Left upper lobe                                          | Lung               | One                        |           |
| 15         | MCC16        | Right hepatic lobe lesion                                | Liver              | One                        |           |

**Supple. Table 2.** Genetic profiling in 42 patient who progressed on osimertinib treatment

(please see as a separate file)

**Supple. Table 3.** Six patients received osimertinib as the first line treatment. All had T790M mutations at initial diagnosis with 4 cases were deemed to have germline EGFR T790M mutation.

| ID  | EGFR status         | Platform    | T790M Germline                    | Best response  | Progressed | Acquired mutations |
|-----|---------------------|-------------|-----------------------------------|----------------|------------|--------------------|
| A25 | G719A T790M         | Guardant360 | Yes (AF 52%)                      | Stable disease | Yes        | None               |
| A46 | H773R T790M         | Tissue MDL  | Called as germline due to high AF | Stable disease | Yes        | TP53 P83fs         |
| A48 | T790M de novo       | Guardant360 | Yes (AF 50%)                      | Response       | No         | N/A                |
| A58 | L858R and T790M     | Tissue MDL  | Called as germline due to high AF | Progression    | Yes        | Not tested         |
| A02 | Del19 T790M de novo | Tissue MDL  | Uncertain                         | Response       | No         | N/A                |
| A38 | L858R T790M de novo | Tissue MDL  | Uncertain                         | Progression    | Yes        | Not tested         |



**Supple. Table 4.** The genetic tests' timing relationship to clinical progressions (PFS1 and PFS2) for the 42 patients with pre- and post-osimertinib genetic data.

| Genetic ID | Pre-osimertinib tests |                | Clinical dates |           |           | Post-osimertinib tests |                |
|------------|-----------------------|----------------|----------------|-----------|-----------|------------------------|----------------|
|            | Platform              | Date Performed | Date osi start | Date PFS1 | Date PFS2 | Platform               | Date Performed |
| 1          | MDL                   | 10/2015        | 4/2016         | 6/2016    | NA        | GH                     | 6/2016         |
| 2          | clinical note         |                | 09/2014        | 12/2015   | NA        | MDL                    | 10/2016        |
|            |                       |                |                |           |           | GH                     | 9/2016         |
| 3          | MDL                   | 9/2014         | 11/2015        | 09/2016   | 06/2017   | MDL                    | 10/2016        |
| 4          | PCR                   | 9/2015         | 10/2016        | 01/2017   | 04/2017   | GH                     | 4/2017         |
|            | Foundation            | 9/2016         |                |           |           | Foundation             | 5/2017         |
| 5          | GH                    | 3/2016         | 05/2016        | 06/2016   | 08/2016   | GH                     | 8/2016         |
| 6          | MDL                   | 5/2012         | 09/2014        | 01/2016   | 04/2016   | MDL                    | 1/2016         |
| 7          | MDL                   | 2/2012         | 10/2015        | 07/2017   | 01/2018   | GH                     | 7/2017         |
|            | GH                    | 8/2015         |                |           |           |                        |                |
| 8          | MDL                   | 11/2012        | 07/2015        | 09/2016   | 12/2016   | GH                     | 11/2016        |
|            | MDL                   | 5/2014         |                |           |           |                        |                |
| 9          | clinical note         |                | 05/2016        | 10/2016   | 07/2017   | GH                     | 9/2017         |
|            |                       |                |                |           |           | Foundation             | 9/2017         |
| 10         | MDL                   | 4/2014         | 12/2015        | 08/2016   | NA        | MDL                    | 8/2016         |
|            | MDL                   | 12/2015        |                |           |           |                        |                |
| 11         | MDL                   | 11/2014        | 06/2016        | 03/2017   | 09/2017   | MDL                    | 4/2017         |
|            | MDL                   | 5/2016         |                |           |           |                        |                |
| GM20       | PCR                   | 2/2016         | 01/2016        | 06/2016   | NA        | MDL                    | 6/2017         |
| GM21       | MDL                   | 10/2014        | 01/2017        | 10/2017   | NA        | GH                     | 10/2017        |
|            |                       |                |                |           |           |                        |                |
| 22         | MDL                   | 07/2013        | 06/2016        | 05/2017   | NA        | MDL                    | 5/2017         |
|            | PCR                   | 01/2015        |                |           |           |                        |                |
|            | GH                    | 5/2016         |                |           |           |                        |                |
| 23         | GH                    | 8/2016         | 01/2017        | 03/2017   | 10/2017   | GH                     | 10/2017        |
|            | MDL                   | 10/2016        |                |           |           |                        |                |
| 24         | clinical note         |                | 01/2015        | 08/2017   | NA        | GH                     | 1/2017         |
| 25         | MDL                   | 9/2014         | 06/2016        | 02/2017   | 09/2017   | GH                     | 9/2017         |
|            | MDL                   | 5/2016         |                |           |           |                        |                |
| 26         | MDL                   | 12/2014        | 08/2016        | 11/2016   | 05/2017   | GH                     | 6/2017         |
|            | MDL                   | 7/2016         |                |           |           |                        |                |
| 27         | GH                    | 01/2016        | 02/2016        | 12/2016   | NA        | MDL                    | 1/2017         |
| 28         | GH                    | 11/2015        | 02/2017        | 08/2017   | 10/2017   | GH                     | 8/2017         |

|    |                 |         |         |            |         |                   |               |
|----|-----------------|---------|---------|------------|---------|-------------------|---------------|
|    | MDL             | 12/2015 |         |            |         |                   |               |
|    | GH              | 11/2016 |         |            |         |                   |               |
|    | MDL             | 12/2016 |         |            |         |                   |               |
| 29 | MDL             | 5/2016  | 07/2016 | 01/2017    | 07/2017 | GH                | 1/2017        |
|    |                 |         |         |            |         | GH                | 7/2017        |
| 30 | Guardant        | 01/2016 | 03/2016 | 05/2017    | NA      | MDL               | 5/2017        |
| 31 | MDL             | 12/2015 | 05/2017 | 08/2017    | 10/2017 | MDL               | 8/2017        |
|    | PCR             | 4/2017  |         |            |         |                   |               |
| 32 | Foundation      | 8/2016  | 12/2016 | 09/2017    | NA      | Foundation        | 9/2017        |
| 33 | MDL             | 02/2015 | 08/2016 | 01/2017    | NA      | MDL               | 1/2017        |
| 34 | MDL             | 3/2014  | 12/2015 | 06/2017    | 01/2018 | MDL               | 7/2017        |
| 35 | MDL             | 12/2014 | 06/2016 | 10/13/2016 | 12/2016 | GH                | 12/2016       |
|    | GH              | 4/2016  |         |            |         | MDL               | 1/2017        |
| 36 | GH              | 9/2016  | 07/2017 | 09/2017    | 10/2017 | MDL               | 9/2017        |
|    | PCR             | 7/2017  |         |            |         |                   |               |
| 37 | GH              | 1/2017  | 01/2017 | 10/2017    | NA      | GH                | 10/2017       |
| 38 | clinical note   | 7/1905  | 09/2014 | 12/2016    | 07/2017 | GH                | 12/2016       |
| 39 | GH              | 12/15   | 1/16    | 9/2016     | 5/2017  | GH                | 9/2016        |
| 40 | Biodesix        | 10/16   | 12/16   | 6/17       | 8/17    | GH                | 7/17          |
| 41 | GH              | 1/17    | 2/17    | 11/17      | NA      | GH                | 11/17         |
| 42 | Foundation      | 8/17    | 9/17    | 11/17      | NA      | GH                | 11/17         |
| 12 | Pyrosequencing  | 9/13    | 6/15    | 11/16      | NA      | Foundation        | 11/16         |
| 13 | GH              | 2/16    | 2/16    | 12/16      | NA      | Biodesix          | 12/16         |
| 14 | Moffitt Trusite | 9/15    | 11/15   | 3/17       | NA      | Foundation        | 3/17          |
| 15 | GH              | 3/16    | 5/16    | 11/16      | 8/17    | Guardant          | 9/16 and 7/17 |
| 16 | Pyrosequencing  | 3/16    | 3/16    | 2/17       | 4/17    | Foundation        | 4/17          |
| 17 | GH              | 7/16    | 8/16    | 2/17       | NA      | Foundation<br>ACT | 1/17          |
| 18 | GH              | 8/15    | 8/15    | 12/15      | NA      | GH                | 12/15         |
| 19 | GH              | 3/16    | 5/16    | 9/16       | NA      | GH                | 9/16          |

**Supple. Table 5.** Tertiary mutations in EGFR gene

| Pt ID | Sensitizing mut | T790M          | Tertiary mut       | Other EGFR mut             | CADD score   |
|-------|-----------------|----------------|--------------------|----------------------------|--------------|
| 2     | del19           | preserved      | L792H              |                            | 30 (L792H)   |
| 3     | del19           | preserved      | C797S              |                            | 24.7 (C797S) |
| 6     | del19           | preserved      | C797S              |                            |              |
| 7     | del19           | preserved      | C797S              |                            |              |
| 9     | L858R           | preserved      | C797S              | H870R <sup>a</sup>         | 23 (H870R)   |
| 10    | L858R           | preserved      | L792H              | V843I <sup>b</sup>         | 28.1 (V843I) |
| 11    | del19           | preserved      | C797S              |                            |              |
| 12    | del19           | preserved      | C797S              |                            |              |
| 14    | del19           | preserved      | C797S              |                            |              |
| 16    | L858R           | preserved      | C620W <sup>a</sup> | Rearrangement <sup>a</sup> | 26.7 (C620W) |
| 17    | del19           | preserved      | C797G              |                            | 27.9 (C797G) |
| 18    | del19           | preserved      | C797S              |                            |              |
| 20    |                 | germline T790M | H773R <sup>b</sup> |                            | 23.3         |
| 21    |                 | germline T790M | G719S <sup>b</sup> |                            | 26.3         |
| 26    | del19           | lost           | P596L <sup>a</sup> |                            | 27.1         |
| 29    | L858R           | lost           | L718Q <sup>a</sup> |                            | 25.8         |
| 32    | del19           | lost           | G724S <sup>a</sup> |                            | 28.5         |
| 34    | L858R           | lost           | V834L <sup>a</sup> |                            | 33           |

a indicates acquired mutation; b indicates pre-existing mutation prior to starting osimertinib.

**Supple. Table 6.** HCC827 parental and HCC827 ER2 cells' sensitivity to multiple small molecule inhibitors.

| Drug (IC50 uM)                 | HCC827 | HCC827 ER2 |
|--------------------------------|--------|------------|
| Erlotinib                      | 0.02   | >10        |
| Osimertinib                    | 0.02   | 13.6       |
| Afatinib                       | 0.01   | 8.99       |
| Crizotinib (MET inhibitor)     | >10    | 0          |
| Trametinib (MEK inhibitor)     | 0.35   | 0.000039   |
| Abemaciclib (CDK4/6 inhibitor) | 1.55   | 0.82       |
| Palbociclib (CDK4/6 inhibitor) | 4.08   | 15         |
| Dinaciclib (pan-CDK inhibitor) | 0.008  | 0.41       |
| Dabrafenib (BRAF inhibitor)    | >10    | >10        |
| Vemurafenib (BRAF inhibitor)   | >10    | >10        |

**Supple Table 7.** Platform-matched pre- and post-osimertinib genetic profiling in 18 patients.

(please see as a separate file)
